# Supplementary material for: Cryptochromes Define a Novel Circadian Clock Mechanism in Monarch Butterflies That May Underlie Sun Compass Navigation
Source: PLOS journal article supplement (doi:10.1371/journal.pbio.0060004), 2008-01-03

**Figure S7.** Monarch PER Alone or in Combination With Submaximal Inhibitory Doses of CRY2 (A) or With TIM (B) Does Not Repress dpCLK:dpCYC-Mediated Transcription Using Luciferase Reporter Gene Assays

**A**

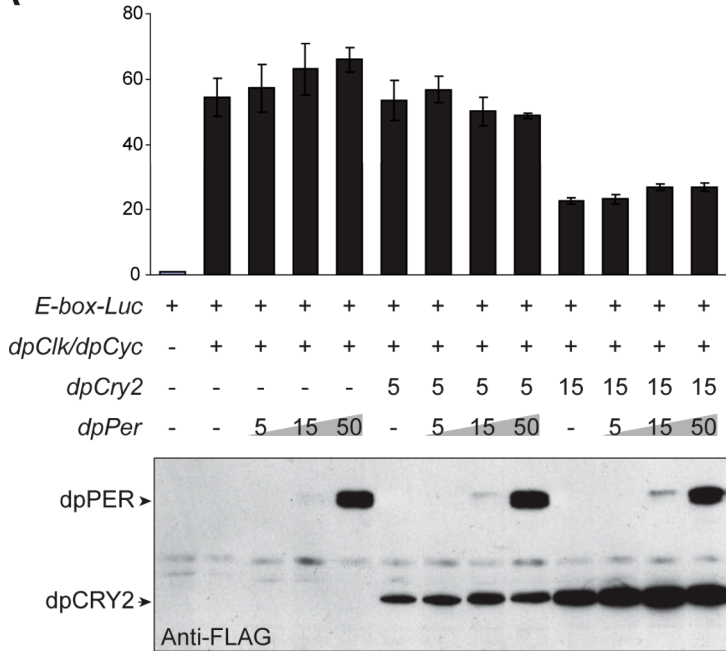

**B**

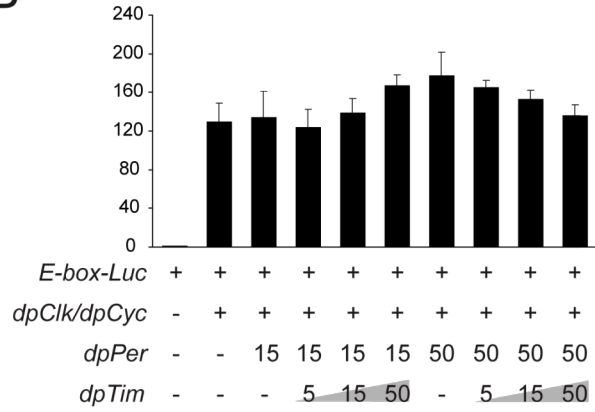

Supplement: S7 (10.1371/journal.pbio.0060004.s007) [file journal.pbio.0060004.s007]
