# Supplementary figures and images for: Cryptochromes Define a Novel Circadian Clock Mechanism in Monarch Butterflies That May Underlie Sun Compass Navigation
Source: PLOS journal article supplement (doi:10.1371/journal.pbio.0060004), 2008-01-03

**Figure S1.** PER is Phosphorylated in Brains and Dpn1 Cells

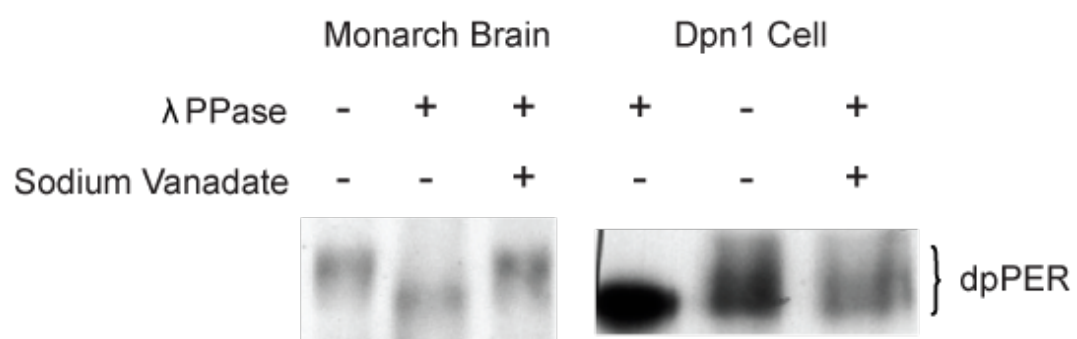

Supplement: S1 (10.1371/journal.pbio.0060004.s001) [file journal.pbio.0060004.s001]

**Figure S9.** CRY2 Protein Levels in DpN1 Cells

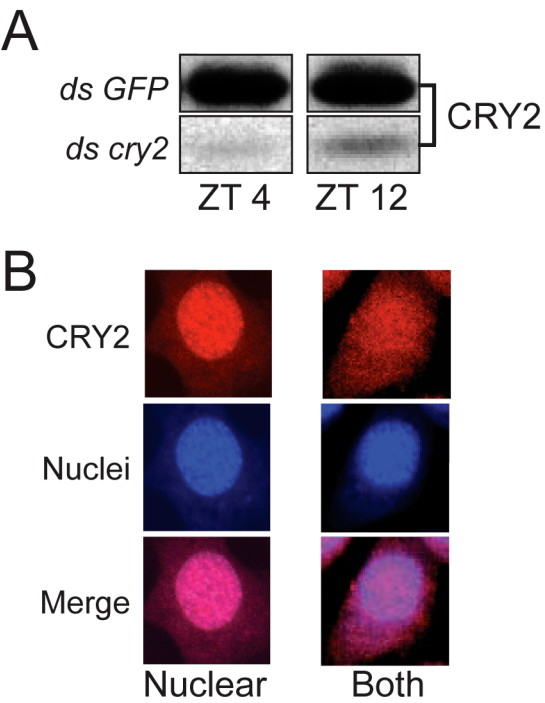

Supplement: S9 (10.1371/journal.pbio.0060004.s009) [file journal.pbio.0060004.s009]
